# Supplementary material for: Induction of T cell exhaustion by JAK1/3 inhibition in the treatment of alopecia areata
Source: PubMed Central journal article supplement (PMC9531018; doi:10.3389/fimmu.2022.955038), 2022-09-20
Supplement: Image_1.pdf [file Image_1.pdf]

## Supplementary Figure 1

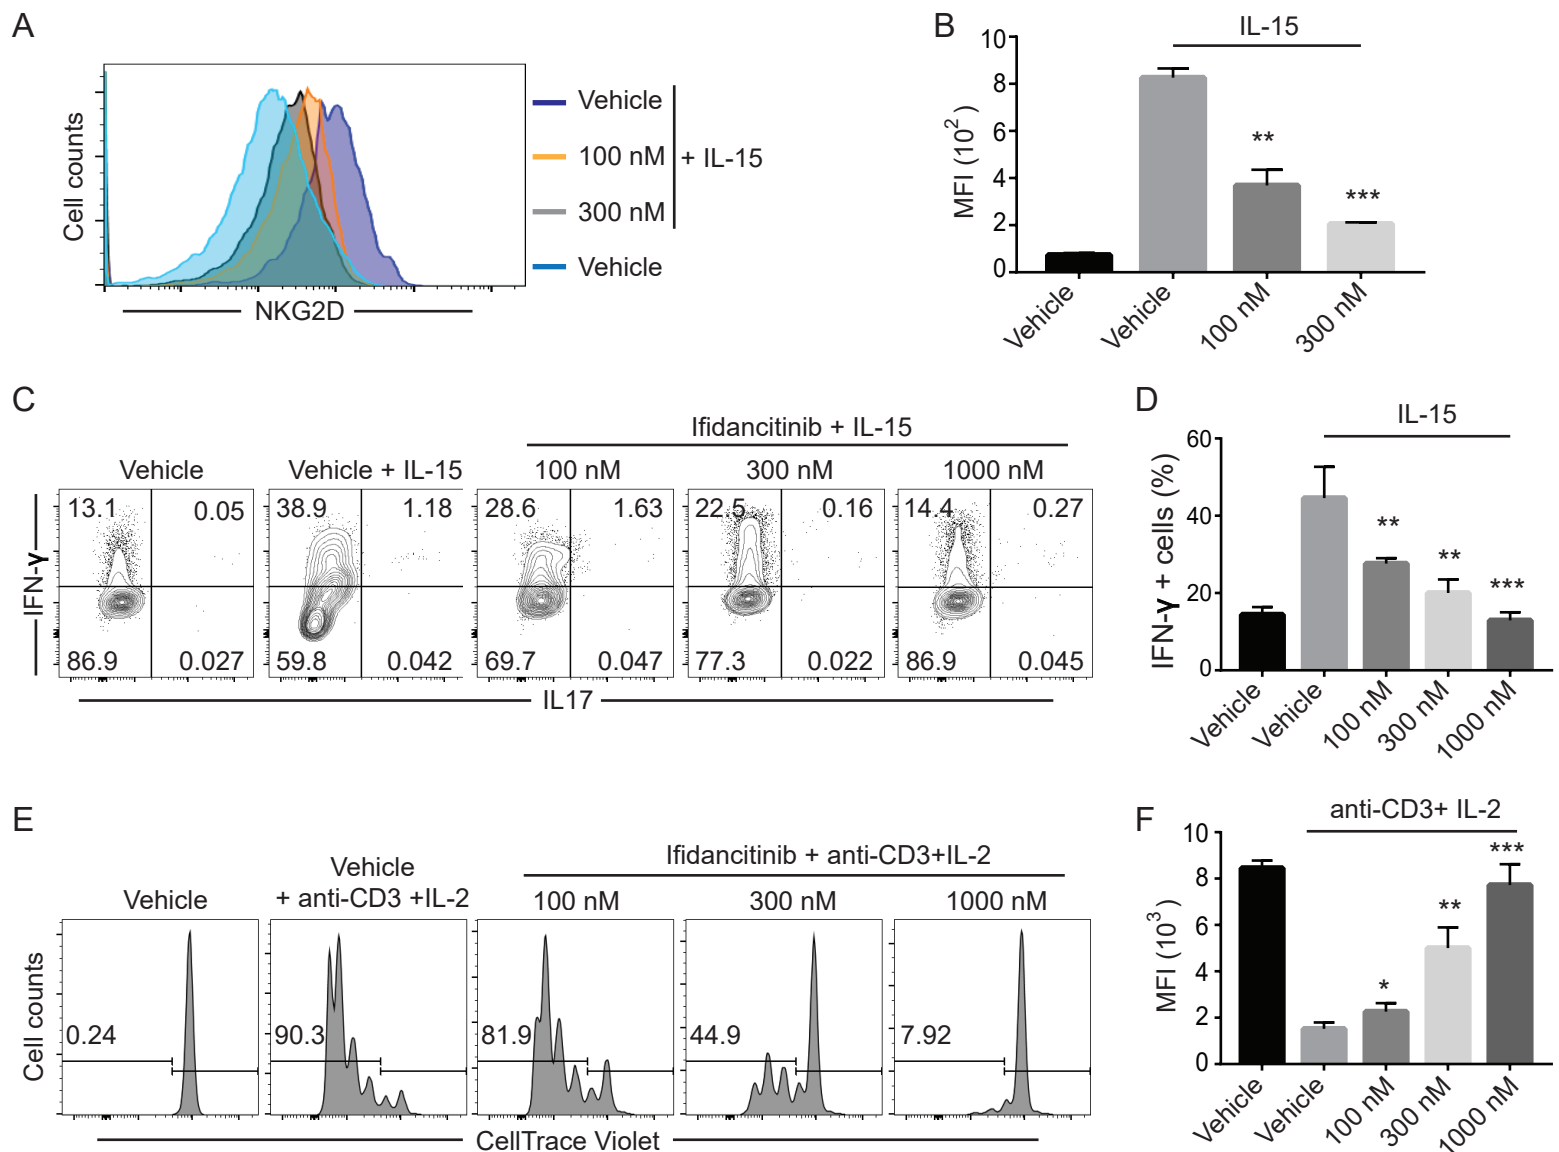

**Supplementary Figure 1.** Ifidancitinib inhibits human T cell activation and proliferation. CellTrace Violet dye CD8<sup>+</sup> T cells were stimulated with rhIL-15 in the presence of DMSO or increasing dose of Ifidancitinib for 4 d. **(A)** The NKG2D expression on CD8<sup>+</sup> T cell was analyzed by flow cytometry. **(B)** The Ifidancitinib or vehicle treated T cells were restimulated with cell stimulation cocktail in the presence of plus protein transport inhibitors and analyzed for the intracellular expression of IFN- $\gamma$  and IL-17. **(C)** CellTrace Violet labeled human CD8<sup>+</sup> T cells were stimulated with anti-CD3 and rhIL-2 in the presence of DMSO or increasing dose of Ifidancitinib for 4 d. Proliferation of the T cells were measured by dilution of CellTrace Violet. The results are representative of two separate experiments. \*P < 0.05, \*\*P < 0.01, \*\*\*P < 0.001 (one-way ANOVA). The results are representative of two separate experiments.
