# Supplementary material for: Induction of T cell exhaustion by JAK1/3 inhibition in the treatment of alopecia areata
Source: PubMed Central journal article supplement (PMC9531018; doi:10.3389/fimmu.2022.955038), 2022-09-20
Supplement: Image_2.pdf [file Image_2.pdf]

## Supplementary Figure 2

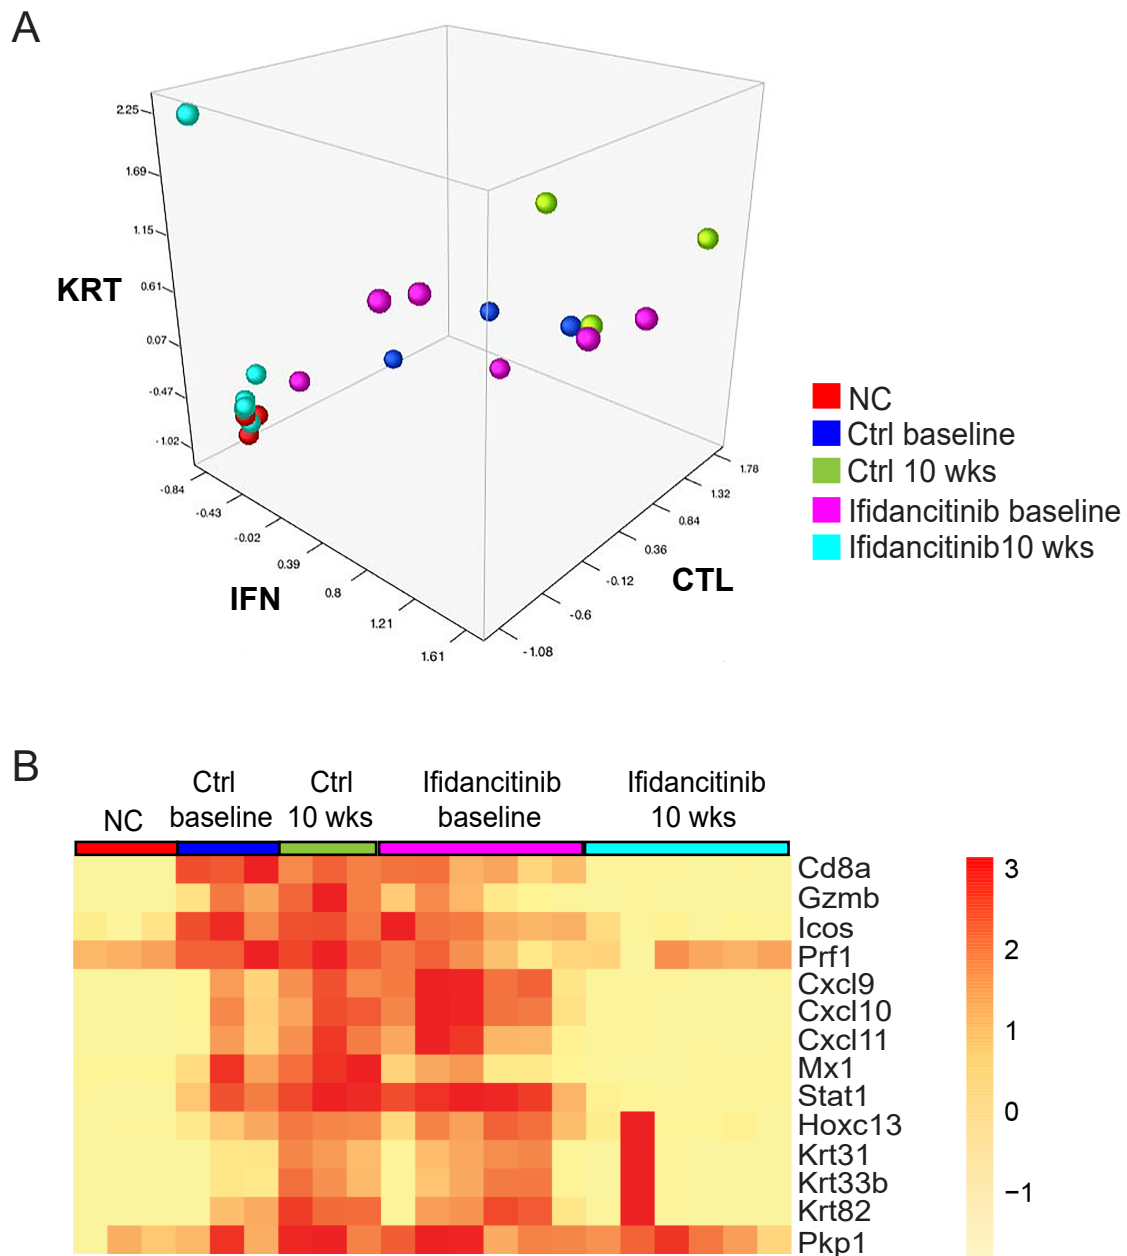

**Supplementary Figure 2.** Molecular responses to Ifidancitinib. Mice were treated as in **Figure 3**. The bulk RNA-Seq (from mouse whole skin) analysis from treated mice with AA (before treatment versus after treatment versus normal mice) presented as a heatmap (**A**) and as a cumulative ALADIN index (**B**).
