# Supplementary material for: Induction of T cell exhaustion by JAK1/3 inhibition in the treatment of alopecia areata
Source: PubMed Central journal article supplement (PMC9531018; doi:10.3389/fimmu.2022.955038), 2022-09-20
Supplement: Image_5.pdf [file Image_5.pdf]

## Supplementary Figure 5

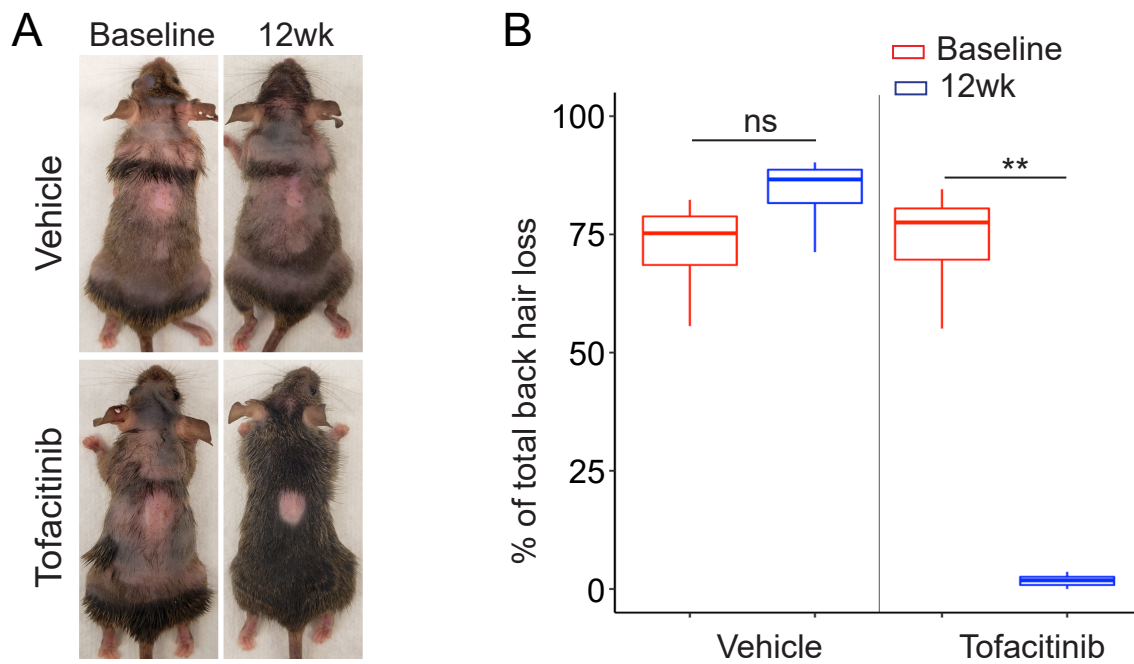

**Supplementary Figure 5.** Reversal of established AA with topical Tofacitinib treatment. C3H/HeJ mice with AA were topically treated with 2% (w/w) Tofacitinib (n=3) or vehicle control (n=3) twice daily for 12 wks. **(A)** Representative images of Tofacitinib or control treated C3H/HeJ mice before or after 12 weeks treatment. **(B)** Percentage of skin hair loss or regrowth is shown before and after treatment. ns indicates not significant, \*\*P < 0.01 (Unpaired Student t test).
